# Supplementary material for: Paired-omics-based exploration and characterisation of biosynthetic diversity in lichenized fungi
Source: Research Square preprint supplement (doi:10.21203/rs.3.rs-6073935/v1), 2025-03-14
Supplement: Supplementary file 1 [file 8e53e5f934aa01ade4ad91dc.xlsx]

## Sheet: Sheet1
Class	Family	Scientific Name	BGC	core PKS	core NRPS	n RiPPs	n terpenes
Lecanoromycetes	Acarosporaceae	Acarospora socialis	46	18	9	9	12
Lecanoromycetes	Acarosporaceae	Acarospora strigata	17	8	9	1	3
Lecanoromycetes	Agyriaceae	Agyrium rufum	56	12	12	41	4
Lecanoromycetes	Parmeliaceae	Alectoria fallacina	67	27	22	22	6
Lecanoromycetes	Parmeliaceae	Alectoria sarmentosa	33	17	12	6	4
Lecanoromycetes	Parmeliaceae	Arctoparmelia_centrifuga	65	33	18	23	6
Dothideomycetes	Trypetheliaceae	Astrothelium macrocarpum	74	38	19	15	6
Dothideomycetes	Trypetheliaceae	Astrothelium subdiscretum	71	38	26	14	6
Lecanoromycetes	Ramalinaceae	Bacidia gigantensis	37	19	12	7	6
Dothideomycetes	Trypetheliaceae	Bathelium albidoporum	80	49	24	11	7
Lecanoromycetes	Parmeliaceae	Bulbothrix africana	74	40	18	13	14
Lecanoromycetes	Parmeliaceae	Bulbothrix sensibilis	52	33	18	8	13
Lecanoromycetes	Acarosporaceae	Caeruleum heppii	12	4	6	0	3
Lecanoromycetes	Teloschistaceae	Caloplaca aegaea	28	15	16	2	4
Lecanoromycetes	Teloschistaceae	Caloplaca aetnensis	41	20	20	8	5
Lecanoromycetes	Teloschistaceae	Caloplaca ligustica	52	19	19	4	6
Lecanoromycetes	Parmeliaceae	Canoparmelia nairobiensis	21	13	6	0	5
Lecanoromycetes	Parmeliaceae	Canoparmelia schelpei	56	32	18	8	13
Lecanoromycetes	Parmeliaceae	Canoparmelia texana	76	48	21	27	12
Lecanoromycetes	Parmeliaceae	Cetraria islandica	76	25	23	13	8
Lecanoromycetes	Cladoniaceae	Cetraria_commixta	47	36	32	24	13
Lecanoromycetes	Cladoniaceae	Cladonia borealis	74	44	23	17	12
Lecanoromycetes	Cladoniaceae	Cladonia grayi	27	14	9	4	2
Lecanoromycetes	Cladoniaceae	Cladonia macilenta	35	25	9	4	3
Lecanoromycetes	Cladoniaceae	Cladonia metacorallifera	39	23	10	6	6
Lecanoromycetes	Cladoniaceae	Cladonia rangiferina	61	42	15	10	6
Lecanoromycetes	Cladoniaceae	Cladonia squamosa	31	19	8	4	6
Lecanoromycetes	Parmeliaceae	Cornicularia normoerica	24	9	9	5	6
Lecanoromycetes	Stictidaceae	Cyanodermella asteris	46	14	15	23	5
Eurotiomycetes	Verrucariaceae	Dermatocarpon miniatum	31	13	10	5	5
Lecanoromycetes	Graphidaceae	Diploschistes diacapsis	20	21	12	16	3
Eurotiomycetes	Verrucariaceae	Endocarpon pusillum	35	20	10	5	7
Lecanoromycetes	Parmeliaceae	Evernia prunastri	89	46	26	18	14
Lecanoromycetes	Parmeliaceae	Flavoparmelia citrinescens	58	23	16	12	10
Lecanoromycetes	Gomphillaceae	Gomphillus americanus	58	10	11	22	3
Lecanoromycetes	Teloschistaceae	Gyalolechia ehrenbergii	38	17	21	1	6
Lecanoromycetes	Teloschistaceae	Gyalolechia flavorubescens	26	14	9	4	3
Lecanoromycetes	Physciaceae	Heterodermia speciosa	74	36	22	17	13
Lecanoromycetes	Parmeliaceae	Hypogymnia subphysodes	62	36	20	7	8
Lecanoromycetes	Icmadophilaceae	Icmadophila ericetorum	81	27	19	50	6
Lecanoromycetes	Parmeliaceae	Imshaugia aleurites	60	25	15	14	10
Lecanoromycetes	Parmeliaceae	Letharia columbiana	54	21	16	19	5
Lecanoromycetes	Parmeliaceae	Letharia lupina	51	25	19	12	6
Lecanoromycetes	Letrouitiaceae	Letrouitia transgressa	56	28	19	16	6
Lecanoromycetes	Trapeliaceae	Lignoscripta atroalba	30	17	7	4	7
Lecanoromycetes	Lobariaceae	Lobaria immixta	85	40	31	19	10
Lecanoromycetes	Sarrameanaceae	Loxospora ochrophaea	14	10	1	3	2
Lecanoromycetes	Parmeliaceae	Melanelia stygia	44	19	17	9	11
Lecanoromycetes	Parmeliaceae	Melanelixia glabra	48	21	17	9	7
Lecanoromycetes	Parmeliaceae	Menegazzia cincinnata	37	30	14	11	9
Lecanoromycetes	Ramalinaceae	Niebla homalea	61	37	19	12	6
Lecanoromycetes	Teloschistaceae	Niorma chrysophthalma	43	13	15	7	8
Lecanoromycetes	Parmeliaceae	Notoparmelia tenuirima	43	25	14	8	7
Lecanoromycetes	Parmeliaceae	Omphalora arizonica	40	22	16	12	6
Lecanoromycetes	Parmeliaceae	Parmelia saxatilis	47	31	17	9	15
Lecanoromycetes	Parmeliaceae	Parmelia tillacea	64	35	25	19	10
Lecanoromycetes	Parmeliaceae	Parmeliopsis ambigua	25	11	6	4	5
Lecanoromycetes	Peltigeraceae	Peltigera leucophlebia	40	18	15	1	11
Lecanoromycetes	Physciaceae	Physcia stellaris	78	26	34	11	16
Lecanoromycetes	Parmeliaceae	Platismatia glauca	37	19	17	7	6
Lecanoromycetes	Parmeliaceae	Pseudephebe pubescens	17	9	5	1	2
Lecanoromycetes	Parmeliaceae	Pseudevernia furfuracea	59	30	23	16	6
Lecanoromycetes	Lobariaceae	Sticta canariensis	17	17	14	11	7
Lecanoromycetes	Lobariaceae	Pseudocyphellaria aurata	44	12	13	10	11
Lecanoromycetes	Trapeliaceae	Ptychographa xylographoides	30	8	6	14	4
Lecanoromycetes	Incertae sedis	Puttea exsequens	33	13	17	6	5
Eurotiomycetes	Pyrenulaceae	Pyrenula aspistea	87	43	20	32	8
Eurotiomycetes	Pyrenulaceae	Pyrenula massariospora	69	53	23	2	7
Lecanoromycetes	Ramalinaceae	Ramalina intermedia	40	31	12	4	1
Lecanoromycetes	Teloschistaceae	Rusavskia elegans	58	33	24	1	8
Lecanoromycetes	Teloschistaceae	Seirophora lacunosa	45	17	20	2	7
Lecanoromycetes	Teloschistaceae	Seirophora villosa	9	19	20	3	8
Lecanoromycetes	Stereocaulaceae	Stereocaulon alpinum	43	21	19	6	8
Lecanoromycetes	Stictidaceae	Stictis urceolata	71	26	18	34	5
Lecanoromycetes	Teloschistaceae	Teloschistes flavicans	44	13	12	3	8
Lecanoromycetes	Teloschistaceae	Teloschistes peruensis	47	19	18	2	8
Lecanoromycetes	Graphidaceae	Thelotrema lepadinum	85	44	22	38	5
Lecanoromycetes	Sporastatiaceae	Toensbergia leucococca	36	10	12	13	3
Lecanoromycetes	Trapeliaceae	Trapelia coarctata	52	26	16	16	7
Dothideomycetes	Trypetheliaceae	Trypethelium eluteriae	65	36	17	8	7
Lecanoromycetes	Umbilicariaceae	Umbilicaria deusta	35	23	7	3	4
Lecanoromycetes	Umbilicariaceae	Umbilicaria freyi	29	9	6	4	8
Lecanoromycetes	Umbilicariaceae	Umbilicaria grisea	22	12	3	3	3
Lecanoromycetes	Umbilicariaceae	Umbilicaria hispanica	79	15	5	1	6
Lecanoromycetes	Umbilicariaceae	Umbilicaria iberica	30	16	5	1	8
Lecanoromycetes	Umbilicariaceae	Umbilicaria muhlenbergii	25	15	5	2	2
Lecanoromycetes	Umbilicariaceae	Umbilicaria phaea	22	11	6	6	3
Lecanoromycetes	Umbilicariaceae	Umbilicaria pustulata	28	18	6	1	6
Lecanoromycetes	Umbilicariaceae	Umbilicaria spodochroa	28	17	6	1	5
Lecanoromycetes	Umbilicariaceae	Umbilicaria vellea	26	15	8	3	4
Lecanoromycetes	Parmeliaceae	Usnea antartica	37	23	9	5	4
Lecanoromycetes	Parmeliaceae	Usnea florida	94	55	34	22	9
Lecanoromycetes	Parmeliaceae	Usnea hakonensis	48	22	18	8	4
Lecanoromycetes	Parmeliaceae	Usnea strigosa	67	36	19	14	6
Lecanoromycetes	Teloschistaceae	Usnochroma carphineum	16	38	20	6	4
Lecanoromycetes	Pertusariaceae	Varicellaria rhodocarpa	17	19	11	30	4
Lecanoromycetes	Teloschistaceae	Variospora aurantia	23	12	18	1	4
Dothideomycetes	Trypetheliaceae	Viridothelium virens	83	39	16	32	11
Lecanoromycetes	Teloschistaceae	Xanthomendoza cf. fulva	50	21	23	6	8
Lecanoromycetes	Teloschistaceae	Xanthoria aureola	44	30	32	2	8
Lecanoromycetes	Teloschistaceae	Xanthoria mediterranea	48	21	25	2	9
Lecanoromycetes	Teloschistaceae	Xanthoria parietina	36	18	19	2	3
Lecanoromycetes	Teloschistaceae	Xanthoria steineri	60	29	32	4	7
Lecanoromycetes	Trapeliaceae	Xylographa bjoerkii	52	24	14	16	5
Lecanoromycetes	Trapeliaceae	Xylographa carneopallida	31	13	7	6	5
Lecanoromycetes	Trapeliaceae	Xylographa opegraphella	31	14	12	6	2
Lecanoromycetes	Trapeliaceae	Xylographa pallens	47	19	15	17	4
Lecanoromycetes	Trapeliaceae	Xylographa parallela	37	14	11	15	4
Lecanoromycetes	Trapeliaceae	Xylographa soralifera	68	35	15	20	5
Lecanoromycetes	Trapeliaceae	Xylographa trunciseda	44	20	11	14	5
Lecanoromycetes	Trapeliaceae	Xylographa vitiligo	44	19	9	19	5
		sum	5199	2622	1726	1186	733
		stddev	19.9789	11.0807	7.09384	9.51934	3.14579
		average	46.8378	23.6216	15.5495	10.6847	6.6036
