# Supplementary material for: Paired-omics-based exploration and characterisation of biosynthetic diversity in lichenized fungi
Source: Research Square preprint supplement (doi:10.21203/rs.3.rs-6073935/v1), 2025-03-14
Supplement: Supplementary file 2 [file e88d10c67677a013e79afeb0.xlsx]

## Sheet: Sheet1
File name	SampleID	Species
20231007_001	PSU3	Parmelia sulcata
20231007_002	XPX5	Xanthoparmelia sp.
20231007_003	PSU4	Parmelia sulcata
20231007_004	LP2	Lobaria pulmonaria
20231007_005	UBP3	umbilicaria pustulata
20231007_006	PSU2	Parmelia sulcata
20231007_007	UBD2	umbilicaria deusta
20231007_008	PSU6	Parmelia sulcata
20231007_009	HPO5	Hypogymnia tubulosa
20231007_010	Pfur1	Pseudevernia furfuracea
20231007_011	PSX1	Peltigera sp.
20231007_012	LP3	Lobaria pulmonaria
20231007_013	CLI1	Cladonia sp.
20231007_014	CLI2	Cladonia sp.
20231007_015	Pfur2	Pseudevernia furfuracea
20231007_016	UBP2	umbilicaria pustulata
20231007_017	RLL3	Relicina limbata
20231007_018	PTX2	Parmotrema sp.
20231007_019	PSX3	Peltigera sp.
20231007_020	PCL51	Pseudocyphellaria holarctica
20231007_021	NN1	Nephromopsis nephromoides
20231007_022	AS12	Alectoria sarmentosa
20231007_023	PCL49	Pseudocyphellaria aurata
20231007_024	ARC2	Arctoparmelia centrifuga
20231007_025	CB1	Cladonia borealis
20231007_026	CLI4	Cladonia sp.
20231007_027	FPCT1	Flavoparmelia citrinescens
20231007_028	UBS1	Umbilicaria spodochroa
20231007_029	PSU3	Parmelia sulcata
20231007_030	LP4	Lobaria pulmonaria
20231007_031	PTX3	Parmotrema sp.
20231007_032	UBP1	umbilicaria polyphylla
20231007_033	PM2	Parmeliopsis macrospora
20231007_034	XPX3	Xanthoparmelia sp.
20231007_035	UR2	Usnea rubrotincta
20231007_036	UR5	Usnea rubrotincta
20231007_037	USB2	usnea scabrida ssp.elegans
20231007_038	UT3	usnea trichodeoides
20231007_039	USA2	usnea subalpina
20231007_040	UOD2	usnea oncodeoides
20231007_041	RLA1	Relicina abstrusa
20231007_042	PP1	Pseudephebe pubescens
20231007_043	CI178	Cetraria islandica
20231007_044	RLS1	Relicina sublanea
20231007_045	PSX2	Peltigera sp.
20231007_046	LP7	Lobaria pulmonaria
20231007_047	PTE1	Parmotrema eborinus
20231007_048	UH6	usnea hakonensis
20231007_049	LI1	Lobaria immixta
20231007_050	MS15	Melanelia stygia
20231007_051	LO1	Lobaria oregana
20231007_052	LI3	Lobaria immixta
20231007_053	LS1	Lobaria sachalinensis
20231007_054	LP5	Lobaria pulmonaria
20231007_055	LP6	Lobaria pulmonaria
20231007_056	UA2	Usnea antarctica
20231007_057	UA1	Usnea aurantiacoatra
20231007_058	MA11	Melanelia agnata
20231007_059	LS2	Lobaria sachalinensis
20231007_060	XX5	Letharia sp.
20231007_061	LI4	Lobaria isdiophora
20231007_062	STX2	Sticta praetextata
20231007_063	LO2	Lobaria oregana
20231007_064	LM1	Lobaria macaronesica
20231007_065	LS3	Lobaria sublaevis
20231007_066	STX3	Sticta platyphylloides
20231007_067	PM1	Parmeliopsis macrospora
20231007_068	PSU5	Parmelia sulcata
20231007_069	HPO4	Hypogymnia physodes
20231007_070	UMS1	usnea molliuscula ssp. queenslandica
20231007_071	MPG2	Melanelia pseudograbra
20231007_072	UMS2	usnea molliuscula ssp. molliuscula
20231007_073	UBS2	Umbilicaria spodochroa
20231007_074	PH1	Parmeliopsis hyperopta
20231007_075	UBG1	umbilicaria grisea
20231007_076	ED2	Evernia divaricata
20231007_077	UX13	Usnea barbata
20231007_078	UBF1	umbilicaria freyi
20231007_079	UBS5	Umbilicaria subpolyphylla
20231007_080	UBF2	umbilicaria freyi
20231007_081	RLF1	Relicina filsonii
20231007_082	UBD1	umbilicaria deusta
20231007_083	PCL50	Pseudocyphellaria aurata
20231007_084	MPG1	Melanelia pseudograbra
20231007_085	UBV2	umbilicaria vellea
20231007_086	UBP5	umbilicaria phaea
20231007_087	UBG2	umbilicaria grisea
20231007_088	HPO6	Hypogymnia tubulosa
20231007_089	PA4	Parmeliopsis ambigua
20231007_090	UI1	Usnea inermis
20231007_091	CDS2	Cetrariella sorediella
20231007_092	CC5	Cetrariella commixta
20231007_093	CF5	Cetrariella fastigiata
20231007_094	CD	Cetrariella delisei
20231007_095	XP1	Xanthoparmelia protomatrae
20231007_096	XC1	Xanthoparmelia camtschadalis
20231007_097	STX1	Sticta canariensis
20231007_098	XS1	Xanthoparmelia subdiffluens
20231007_099	UK1	Usnea beckeri
20231007_100	CLR1	Cladonia rangiferina
20231007_101	ASA7	Asahinea chrysantha
20231007_102	CI192	Cetraria islandica
20231007_103	EM4	Evernia mesomorpha
20231007_104	EP2	Evernia prunastri
20231007_105	ED1	Evernia divaricata
20231007_106	DA2	Dactylina arctica
20231007_107	ASA6	Asahinea chrysantha
20231007_108	EE2	Evernia esorediosa
20231007_109	PS	Peltigera sp.
20231007_110	CC4	Cetrariella commixta
20231007_111	SA	Stereocaulon alpinum
20231007_112	PSU1	Parmelia sulcata
20231007_113	EM1	Evernia mesomorpha
20231007_114	UM2	Protousnea malacea
20231007_115	XT1	Xanthoparmelia tinctina
20231007_116	CG1	Cladonia gracilis
20231007_117	UU1	Usnea subfloridana
20231007_118	ARC1	Arctoparmelia centrifuga
20231007_119	LI2	Lobaria immixta
20231007_120	TP1	Tuckermannopsis platyphylla
20231007_121	NPA1	Nephromopsis asahinae
20231007_122	NL1	Nephromopsis laureri
20231007_123	NW2	Nephromopsis wallichiana
20231007_124	NE1	Nephromopsis endocrocea
20231007_125	XPX2	Xanthoparmelia sp.
20231007_126	XPX4	Xanthoparmelia sp.
20231007_127	MX3	Melanohalea sp.
20231007_128	UPO1	Protousnea poeppigii
20231007_129	LP1	Lobaria pulmonaria
20231007_130	UBP4	umbilicaria phaea
20231007_131	PTX1	Parmotrema xanthinum
20231007_132	XPX1	Xanthoparmelia sp.
20231007_133	UO1	Usnocetraria oakesiana
20231007_134	UX30	Usnea sp.
20231007_135	UBS4	Umbilicaria subpolyphylla
20231007_136	UBV1	umbilicaria vellea
20231007_137	LM2	Lobaria macaronesica

## Sheet: Sheet2
Sample list	Species singletone	species with genomic data		samples with genomic data
Alectoria sarmentosa	Alectoria sarmentosa	Alectoria sarmentosa		Alectoria sarmentosa
Arctoparmelia centrifuga	Arctoparmelia centrifuga	Arctoparmelia centrifuga		Arctoparmelia centrifuga
Arctoparmelia centrifuga	Asahinea chrysantha	Cetraria islandica		Arctoparmelia centrifuga
Asahinea chrysantha	Cetraria islandica	Cetrariella commixta		Cetraria islandica
Asahinea chrysantha	Cetrariella commixta	Cladonia borealis		Cetraria islandica
Cetraria islandica	Cetrariella delisei	Cladonia rangiferina		Cetrariella commixta
Cetraria islandica	Cetrariella fastigiata	Evernia prunastri		Cetrariella commixta
Cetrariella commixta	Cetrariella sorediella	Flavoparmelia citrinescens		Cladonia borealis
Cetrariella commixta	Cladonia borealis	Lobaria immixta		Cladonia rangiferina
Cetrariella delisei	Cladonia gracilis	Melanelia stygia		Evernia prunastri
Cetrariella fastigiata	Cladonia rangiferina	Parmelia sulcata		Flavoparmelia citrinescens
Cetrariella sorediella	Dactylina arctica	Parmeliopsis ambigua		Lobaria immixta
Cladonia borealis	Evernia divaricata	Pseudephebe pubescens		Lobaria immixta
Cladonia gracilis	Evernia esorediosa	Pseudevernia furfuracea		Lobaria immixta
Cladonia rangiferina	Evernia mesomorpha	Pseudocyphellaria aurata		Melanelia stygia
Cladonia sp.	Evernia prunastri	Stereocaulon alpinum		Parmelia sulcata
Cladonia sp.	Flavoparmelia citrinescens	Sticta canariensis		Parmelia sulcata
Cladonia sp.	Hypogymnia physodes	umbilicaria deusta		Parmelia sulcata
Dactylina arctica	Hypogymnia tubulosa	umbilicaria freyi		Parmelia sulcata
Evernia divaricata	Letharia sp.	umbilicaria grisea		Parmelia sulcata
Evernia divaricata	Lobaria immixta	umbilicaria phaea		Parmelia sulcata
Evernia esorediosa	Lobaria isdiophora	umbilicaria pustulata		Parmelia sulcata
Evernia mesomorpha	Lobaria macaronesica	Umbilicaria spodochroa		Parmeliopsis ambigua
Evernia mesomorpha	Lobaria oregana	Umbilicaria subpolyphylla		Pseudevernia furfuracea
Evernia prunastri	Lobaria pulmonaria	umbilicaria vellea		Pseudevernia furfuracea
Flavoparmelia citrinescens	Lobaria sachalinensis	Usnea antarctica		Pseudocyphellaria aurata
Hypogymnia physodes	Lobaria sublaevis	usnea hakonensis		Pseudocyphellaria aurata
Hypogymnia tubulosa	Melanelia agnata			Stereocaulon alpinum
Hypogymnia tubulosa	Melanelia pseudograbra			Sticta canariensis
Letharia sp.	Melanelia stygia			umbilicaria deusta
Lobaria immixta	Melanohalea sp.			umbilicaria deusta
Lobaria immixta	Nephromopsis asahinae			umbilicaria freyi
Lobaria immixta	Nephromopsis endocrocea			umbilicaria freyi
Lobaria isdiophora	Nephromopsis laureri			umbilicaria grisea
Lobaria macaronesica	Nephromopsis nephromoides			umbilicaria grisea
Lobaria macaronesica	Nephromopsis wallichiana			umbilicaria phaea
Lobaria oregana	Parmelia sulcata			umbilicaria phaea
Lobaria oregana	Parmeliopsis ambigua			umbilicaria pustulata
Lobaria pulmonaria	Parmeliopsis hyperopta			umbilicaria pustulata
Lobaria pulmonaria	Parmeliopsis macrospora			Umbilicaria spodochroa
Lobaria pulmonaria	Parmotrema eborinus			Umbilicaria spodochroa
Lobaria pulmonaria	Parmotrema sp.			Umbilicaria subpolyphylla
Lobaria pulmonaria	Parmotrema xanthinum			Umbilicaria subpolyphylla
Lobaria pulmonaria	Peltigera sp.			umbilicaria vellea
Lobaria pulmonaria	Protousnea malacea			umbilicaria vellea
Lobaria sachalinensis	Protousnea poeppigii			Usnea antarctica
Lobaria sachalinensis	Pseudephebe pubescens			usnea hakonensis
Lobaria sublaevis	Pseudevernia furfuracea
Melanelia agnata	Pseudocyphellaria aurata
Melanelia pseudograbra	Pseudocyphellaria holarctica
Melanelia pseudograbra	Relicina abstrusa
Melanelia stygia	Relicina filsonii
Melanohalea sp.	Relicina limbata
Nephromopsis asahinae	Relicina sublanea
Nephromopsis endocrocea	Stereocaulon alpinum
Nephromopsis laureri	Sticta canariensis
Nephromopsis nephromoides	Sticta platyphylloides
Nephromopsis wallichiana	Sticta praetextata
Parmelia sulcata	Tuckermannopsis platyphylla
Parmelia sulcata	umbilicaria deusta
Parmelia sulcata	umbilicaria freyi
Parmelia sulcata	umbilicaria grisea
Parmelia sulcata	umbilicaria phaea
Parmelia sulcata	umbilicaria polyphylla
Parmelia sulcata	umbilicaria pustulata
Parmeliopsis ambigua	Umbilicaria spodochroa
Parmeliopsis hyperopta	Umbilicaria subpolyphylla
Parmeliopsis macrospora	umbilicaria vellea
Parmeliopsis macrospora	Usnea antarctica
Parmotrema eborinus	Usnea aurantiacoatra
Parmotrema sp.	Usnea barbata
Parmotrema sp.	Usnea beckeri
Parmotrema xanthinum	usnea hakonensis
Peltigera sp.	Usnea inermis
Peltigera sp.	usnea molliuscula ssp. molliuscula
Peltigera sp.	usnea molliuscula ssp. queenslandica
Peltigera sp.	usnea oncodeoides
Protousnea malacea	Usnea rubrotincta
Protousnea poeppigii	usnea scabrida ssp.elegans
Pseudephebe pubescens	Usnea sp.
Pseudevernia furfuracea	usnea subalpina
Pseudevernia furfuracea	Usnea subfloridana
Pseudocyphellaria aurata	usnea trichodeoides
Pseudocyphellaria aurata	Usnocetraria oakesiana
Pseudocyphellaria holarctica	Xanthoparmelia camtschadalis
Relicina abstrusa	Xanthoparmelia protomatrae
Relicina filsonii	Xanthoparmelia sp.
Relicina limbata	Xanthoparmelia sp.
Relicina sublanea	Xanthoparmelia sp.
Stereocaulon alpinum	Xanthoparmelia sp.
Sticta canariensis	Xanthoparmelia sp.
Sticta platyphylloides	Xanthoparmelia subdiffluens
Sticta praetextata	Xanthoparmelia tinctina
Tuckermannopsis platyphylla
umbilicaria deusta
umbilicaria deusta
umbilicaria freyi
umbilicaria freyi
umbilicaria grisea
umbilicaria grisea
umbilicaria phaea
umbilicaria phaea
umbilicaria polyphylla
umbilicaria pustulata
umbilicaria pustulata
Umbilicaria spodochroa
Umbilicaria spodochroa
Umbilicaria subpolyphylla
Umbilicaria subpolyphylla
umbilicaria vellea
umbilicaria vellea
Usnea antarctica
Usnea aurantiacoatra
Usnea barbata
Usnea beckeri
usnea hakonensis
Usnea inermis
usnea molliuscula ssp. molliuscula
usnea molliuscula ssp. queenslandica
usnea oncodeoides
Usnea rubrotincta
Usnea rubrotincta
usnea scabrida ssp.elegans
Usnea sp.
usnea subalpina
Usnea subfloridana
usnea trichodeoides
Usnocetraria oakesiana
Xanthoparmelia camtschadalis
Xanthoparmelia protomatrae
Xanthoparmelia sp.
Xanthoparmelia sp.
Xanthoparmelia sp.
Xanthoparmelia sp.
Xanthoparmelia sp.
Xanthoparmelia subdiffluens
Xanthoparmelia tinctina
