# Supplementary material for: Paired-omics-based exploration and characterisation of biosynthetic diversity in lichenized fungi
Source: Research Square preprint supplement (doi:10.21203/rs.3.rs-6073935/v1), 2025-03-14
Supplement: Supplementary file 3 [file ef81fe7d54149dd7a382480f.xlsx]

## Sheet: Sheet1
Family	Species	Genome/SRA accession	number of scaffolds	Genome completeness
Acarosporaceae	Acarospora socialis	GCA_025617375	930	97.8
Acarosporaceae	Acarospora strigata	GCA_022814355	475	97.9
Agyriaceae	Agyrium rufum	GCA_022814335	239	97.5
Parmeliaceae	Alectoria fallacina	GCA_905337325	1588	97.5
Parmeliaceae	Alectoria sarmentosa	GCA_009733775	915	97.4
Parmeliaceae	Arctoparmelia centrifuga	SAMN41602368	3998	93
Trypetheliaceae	Astrothelium macrocarpum	GCA_021030915	822	97.9
Trypetheliaceae	Astrothelium subdiscretum	GCA_021030935	213	97.9
Ramalinaceae	Bacidia gigantensis	GCA_019456465	24	95.8
Trypetheliaceae	Bathelium albidoporum	GCA_021031095	962	95.1
Parmeliaceae	Bulbothrix africana	SAMN41602369	3502	83.4
Parmeliaceae	Bulbothrix sensibilis	SAMN41602370	5085	74.8
Acarosporaceae	Caeruleum heppii	GCA_026023835	46	97
Teloschistaceae	Caloplaca aegaea	GCA_023646655	6484	90.1
Teloschistaceae	Caloplaca aetnensis	GCA_023646255	2772	93.8
Teloschistaceae	Caloplaca ligustica	GCA_023645885	1915	84.9
Parmeliaceae	Canoparmelia nairobiensis	SAMN41602371	4073	83.7
Parmeliaceae	Canoparmelia schelpei	SAMN41602372	3344	84
Parmeliaceae	Canoparmelia texana	SAMN41602373	4847	91.4
Parmeliaceae	Cetraria islandica	SAMN41602375	2958	86
Parmeliaceae	Cetraria_commixta	SAMN41602374	3474	87.6
Cladoniaceae	Cladonia borealis	GCA_018257855	974	96.9
Cladoniaceae	Cladonia grayi	XXX	44	96.7
Cladoniaceae	Cladonia macilenta	GCA_000444155	240	97.2
Cladoniaceae	Cladonia metacorallifera	GCA_000482085	30	96.5
Cladoniaceae	Cladonia rangiferina	GCA_023065455	188	96.6
Cladoniaceae	Cladonia squamosa	GCA_947623385	165	97.7
Parmeliaceae	Cornicularia normoerica	SAMN41602376	4314	91.5
Stictidaceae	Cyanodermella asteris	GCA_900618795	37	97.4
Verrucariaceae	Dermatocarpon miniatum	GCA_023184605	26	97.3
Graphidaceae	Diploschistes diacapsis	GCA_023645945	4361	89
Verrucariaceae	Endocarpon pusillum	GCA_000464535	908	92.8
Parmeliaceae	Evernia prunastri	GCA_003184365	276	97.5
Parmeliaceae	Flavoparmelia citrinescens	SAMN41602377	3250	84.2
Gomphillaceae	Gomphillus americanus	GCA_905337335	54	97.7
Teloschistaceae	Gyalolechia ehrenbergii	GCA_023646125	317	96.8
Teloschistaceae	Gyalolechia flavorubescens	GCA_000442125	36	97.1
Physciaceae	Heterodermia speciosa	GCA_905337345	1070	95
Parmeliaceae	Hypogymnia subphysodes	SAMN41602378	3865	93.9
Icmadophilaceae	Icmadophila ericetorum	GCA_022814295	836	97
Parmeliaceae	Imshaugia aleurites	GCA_905337355	504	96.8
Parmeliaceae	Letharia columbiana	GCA_014066305	161	96.1
Parmeliaceae	Letharia lupina	GCA_014066315	31	96.7
Letrouitiaceae	Letrouitia transgressa	GCA_023645855	501	97
Trapeliaceae	Lignoscripta atroalba	GCA_022814235	238	97.3
Lobariaceae	Lobaria immixta	GCA_022814215	1243	97.5
Sarrameanaceae	Loxospora ochrophaea	GCA_022814175	165	97.8
Parmeliaceae	Melanelia stygia	SAMN41602379	3306	89.8
Parmeliaceae	Melanelixia glabra	SAMN41602380	2653	87.7
Parmeliaceae	Menegazzia cincinnata	SAMN41602381	5647	83
Ramalinaceae	Niebla homalea	GCA_019925105	52	96.4
Teloschistaceae	Niorma chrysophthalma	GCA_023646055	776	97.1
Parmeliaceae	Notoparmelia tenuirima	SAMN41602382	3012	84.8
Parmeliaceae	Omphalora arizonica	SAMN41602383	2892	88.8
Parmeliaceae	Parmelia saxatilis	SAMN41602384	2979	85.3
Parmeliaceae	Parmelia tillacea	SAMN41602385	3010	85.4
Parmeliaceae	Parmeliopsis ambigua	SAMN41602386	6866	86.4
Peltigeraceae	Peltigera leucophlebia	GCA_022814155	4464	78
Physciaceae	Physcia stellaris	GCA_018902385	155	95.6
Parmeliaceae	Platismatia glauca	GCA_963556305	2560	85.5
Parmeliaceae	Pseudephebe pubescens	SAMN41602387	3646	92.2
Parmeliaceae	Pseudevernia furfuracea	GCA_022315425	46	89.1
Lobariaceae	Pseudocyphellaria aurata	GCA_022814125	978	97.2
Trapeliaceae	Ptychographa xylographoides	GCA_022814105	132	97.9
Incertae sedis	Puttea exsequens	GCA_022814085	122	96.8
Pyrenulaceae	Pyrenula aspistea	GCA_021030945	482	97.1
Pyrenulaceae	Pyrenula massariospora	GCA_021030905	42	97.1
Ramalinaceae	Ramalina intermedia	GCA_003073195	198	95.9
Teloschistaceae	Rusavskia elegans	GCA_011316305	263	96.8
Teloschistaceae	Seirophora lacunosa	GCA_023645825	428	97.8
Teloschistaceae	Seirophora villosa	GCA_023645815	2163	93.1
Stereocaulaceae	Stereocaulon alpinum	GCA_018257865	546	97.5
Peltigeraceae	Sticta canariensis	GCA_022814045	3190	86.3
Stictidaceae	Stictis urceolata	GCA_022814025	547	96.9
Teloschistaceae	Teloschistes flavicans	GCA_023646325	1520	95.2
Teloschistaceae	Teloschistes peruensis	GCA_023645835	966	97.1
Graphidaceae	Thelotrema lepadinum	GCA_022813995	355	96.1
Sporastatiaceae	Toensbergia leucococca	GCA_022813965	490	95.9
Trapeliaceae	Trapelia coarctata	GCA_022813945	287	97.2
Trypetheliaceae	Trypethelium eluteriae	GCA_021030925	1669	94.8
Umbilicariaceae	Umbilicaria deusta	GCA_023184635	44	96.3
Umbilicariaceae	Umbilicaria freyi	GCA_023184675	107	95.5
Umbilicariaceae	Umbilicaria grisea	GCA_023184595	38	96.8
Umbilicariaceae	Umbilicaria hispanica	GCA_023184715	53	94.8
Umbilicariaceae	Umbilicaria iberica	GCA_023184615.1	39	99.3
Umbilicariaceae	Umbilicaria muhlenbergii	GCA_000611775.1	7	96
Umbilicariaceae	Umbilicaria phaea	GCA_023184695	38	96.6
Umbilicariaceae	Umbilicaria pustulata	GCA_023184575	27	95.1
Umbilicariaceae	Umbilicaria spodochroa	GCA_023184705	130	97.3
Umbilicariaceae	Umbilicaria vellea	GCA_023645895	3107	86.6
Parmeliaceae	Usnea antartica	SAMN41602388	1100	72.4
Parmeliaceae	Usnea florida	ATCC18376 v1.0	274	97
Parmeliaceae	Usnea hakonensis	GCA_013423325	879	96.3
Parmeliaceae	Usnea strigosa	SAMN41602389	8736	72.4
Teloschistaceae	Usnochroma carphineum	GCA_023645975	2385	97.1
Pertusariaceae	Varicellaria rhodocarpa	GCA_022813925	2689	98.2
Teloschistaceae	Variospora aurantia	GCA_023645955	5327	86.3
Trypetheliaceae	Viridothelium virens	GCA_010094025	730	98.2
Teloschistaceae	Xanthomendoza cf. fulva	GCA_023646365	951	97.2
Teloschistaceae	Xanthoria aureola	GCA_023646375	5150	95.5
Teloschistaceae	Xanthoria mediterranea	GCA_023645845	447	97.3
Teloschistaceae	Xanthoria parietina	Xanthoria parietina 46-1-SA22 v1.1	39	96.9
Teloschistaceae	Xanthoria steineri	GCA_023646075	2267	96.8
Trapeliaceae	Xylographa bjoerkii	GCA_022813905	1006	97.4
Trapeliaceae	Xylographa carneopallida	GCA_022813885	409	97.5
Trapeliaceae	Xylographa opegraphella	GCA_022813865	481	97.4
Trapeliaceae	Xylographa pallens	GCA_022813845	320	97.8
Trapeliaceae	Xylographa parallela	GCA_022813825	381	97.7
Trapeliaceae	Xylographa soralifera	GCA_022813805	738	97.8
Trapeliaceae	Xylographa trunciseda	GCA_022813785	513	97
Trapeliaceae	Xylographa vitiligo	GCA_022813765	188	97.4
